# Supplementary material for: nCov2019: an R package for studying the COVID-19 coronavirus pandemic
Source: PeerJ journal article supplement (doi:10.7717/peerj.11421), 2021-06-10

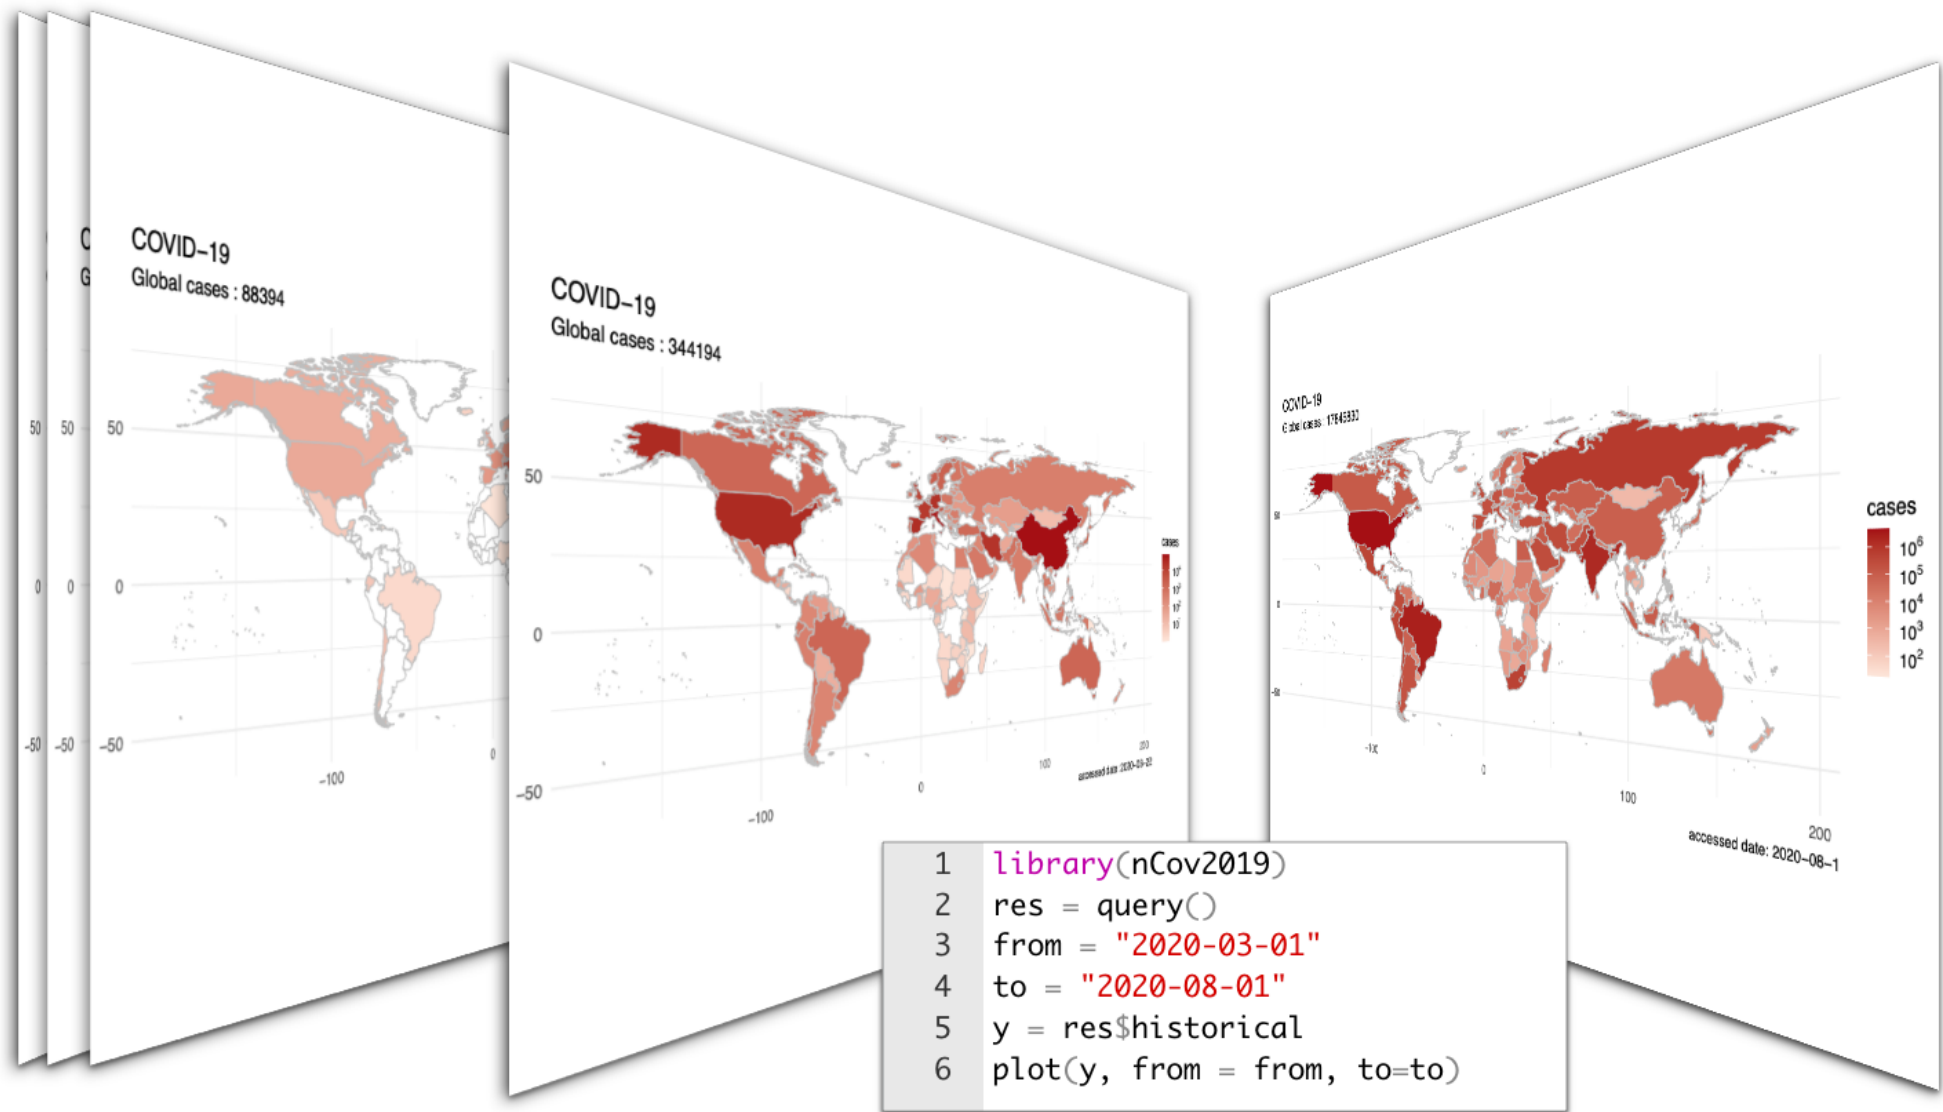

Supplement: FigureS1.pdf [file FigureS1.pdf]
