# Supplementary material for: nCov2019: an R package for studying the COVID-19 coronavirus pandemic
Source: PubMed Central journal article supplement (PMC8199916; doi:10.7717/peerj.11421), 2021-06-10

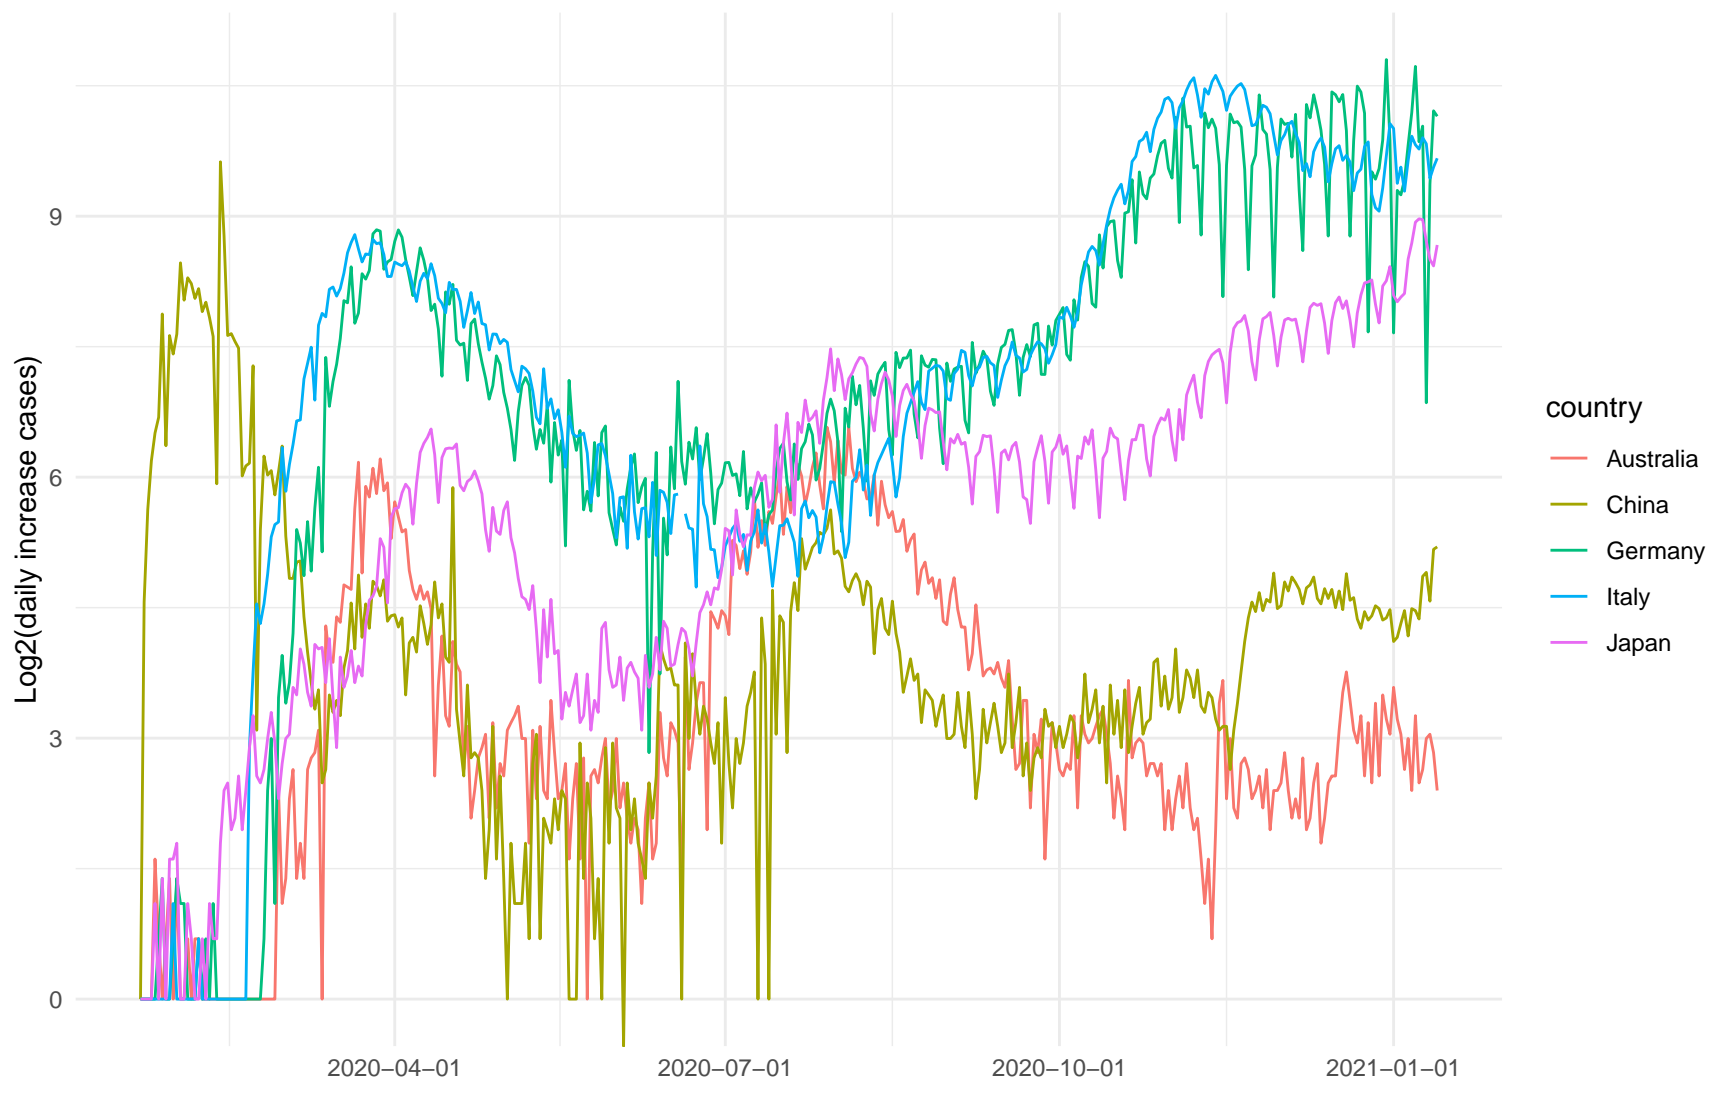

Supplement: peerj-09-11421-s003.pdf [file peerj-09-11421-s003.pdf]
